# Supplementary material for: The Effect of Migratory Beekeeping on the Infestation Rate of Parasites in Honey Bee (Apis mellifera) Colonies and on Their Genetic Variability
Source: PubMed Central journal article supplement (PMC7822443; doi:10.3390/microorganisms9010022), 2020-12-23
Supplement: microorganisms-09-00022-s001.pdf [file microorganisms-09-00022-s001.pdf]

The effect of migratory beekeeping on the infestation rate of parasites in honey bee (*Apis mellifera*) colonies and on their genetic variability

Laura Jara, Carlos Ruiz, Raquel Martín-Hernández, Irene Muñoz, Mariano Higes, José Serrano and Pilar De la Rúa

Table S1. Data obtained for each colony of the two groups: migratory (M) and stationary (S) in the four sampling times (T<sub>0</sub>-T<sub>3</sub>).

| Code | Group | <i>V. destructor</i> (%) |                |                |                | <i>N. ceranae</i> (%) |                |                |                | <i>N. apis</i> (%) |                |                |                | Co-infections by both <i>Nosema</i> spp (%) |                |                |                | DWV copies/bee |                |                |                | Brood combs (No.) |                |                |                |
|------|-------|--------------------------|----------------|----------------|----------------|-----------------------|----------------|----------------|----------------|--------------------|----------------|----------------|----------------|---------------------------------------------|----------------|----------------|----------------|----------------|----------------|----------------|----------------|-------------------|----------------|----------------|----------------|
|      |       | T <sub>0</sub>           | T <sub>1</sub> | T <sub>2</sub> | T <sub>3</sub> | T <sub>0</sub>        | T <sub>1</sub> | T <sub>2</sub> | T <sub>3</sub> | T <sub>0</sub>     | T <sub>1</sub> | T <sub>2</sub> | T <sub>3</sub> | T <sub>0</sub>                              | T <sub>1</sub> | T <sub>2</sub> | T <sub>3</sub> | T <sub>0</sub> | T <sub>1</sub> | T <sub>2</sub> | T <sub>3</sub> | T <sub>0</sub>    | T <sub>1</sub> | T <sub>2</sub> | T <sub>3</sub> |
| 1UM  | M     | 2.6                      | 1.4            | 42             | NA             | 16.7                  | 32             | 4              | NA             | 0                  | 0              | 0              | NA             | 0                                           | 0              | 0              | NA             | 2.22E+04       | 2.22E+04       | 2.15E+06       | NA             | 0                 | 0              | 3              | 0              |
| 2UM  | M     | 5.7                      | 4.6            | 10.8           | 5.8            | 0                     | 15.8           | 8.7            | 4.5            | 0                  | 0              | 0              | 0              | 0                                           | 0              | 0              | 0              | 1.11E+05       | 1.80E+05       | 3.28E+06       | 2.26E+06       | 8                 | 8              | 2              | 2              |
| 3UM  | M     | 1.2                      | 5.6            | 7.8            | 3.4            | 9.1                   | 13.6           | 32             | 4.5            | 0                  | 0              | 0              | 9.1            | 0                                           | 4.5            | 0              | 0              | 3.22E+05       | 4.10E+06       | 5.13E+05       | 2.55E+06       | 6                 | 6              | 2              | 2              |
| 4UM  | M     | 8.7                      | 2              | 9.4            | 4.4            | 0                     | 13.6           | 0              | 0              | 0                  | 0              | 9.1            | 0              | 0                                           | 0              | 0              | 0              | 3.56E+06       | 1.70E+06       | 6.89E+06       | 1.07E+06       | 3                 | 3              | 3              | 3              |
| 5UM  | M     | 0.7                      | 1.1            | 19.8           | 8.5            | 0                     | 4.5            | 9.1            | 4.8            | 0                  | 0              | 0              | 0              | 0                                           | 0              | 0              | 0              | 5.14E+04       | 1.06E+05       | 2.22E+04       | 5.75E+04       | 4                 | 4              | 2              | 1              |
| 6PB  | M     | 20.3                     | 36.7           | NA             | NA             | 28.6                  | 31.8           | NA             | NA             | 0                  | 0              | NA             | NA             | 0                                           | 4.5            | NA             | NA             | 2.22E+04       | 2.22E+04       | NA             | NA             | 6                 | 6              | NA             | NA             |
| 7PB  | M     | 2.2                      | 4.8            | 82.7           | NA             | 0.0                   | 18.2           | 27.3           | NA             | 0                  | 0              | 0              | NA             | 4.5                                         | 4.5            | 0              | NA             | 2.22E+04       | 4.47E+04       | 2.22E+04       | NA             | 4                 | 4              | 0              | NA             |
| 8PB  | M     | 0.3                      | 0.4            | 0.9            | 4.9            | 5.6                   | 36.8           | 11.5           | 4.8            | 0                  | 0              | 0              | 0              | 0                                           | 15.8           | 0              | 0              | 2.22E+04       | 2.22E+04       | 2.22E+04       | 2.22E+04       | 1                 | 1              | 2              | 3              |
| 9PB  | M     | 0                        | 0              | 0.6            | 0              | 22.7                  | 40.9           | 22.7           | 9.1            | 0                  | 4.5            | 4.5            | 0              | 0                                           | 9.1            | 0              | 0              | 2.22E+04       | 4.32E+04       | 2.22E+04       | 2.22E+04       | 8                 | 8              | 2              | 2              |
| 10PB | M     | 2.8                      | 0              | 60.9           | 32.9           | 0.0                   | 21.7           | 44             | 0              | 20                 | 0              | 0              | 0              | 12                                          | 0              | 4              | 0              | 2.22E+04       | 9.00E+04       | 1.27E+06       | 4.14E+06       | 0                 | 0              | 3              | 2              |
| 1UM  | S     | 3.9                      | 4.5            | 0              | 5.1            | 4.5                   | 4.5            | 4.5            | 0              | 0                  | 0              | 0              | 0              | 0                                           | 0              | 0              | 0              | 3.33E+04       | 5.53E+05       | 5.91E+04       | 2.22E+04       | 8                 | 8              | 3              | 0              |
| 2UM  | S     | 3                        | 12.4           | 0              | 0.8            | 4                     | 0              | 0              | 0              | 0                  | 0              | 0              | 0              | 0                                           | 0              | 0              | 0              | 4.32E+04       | 2.22E+04       | 2.22E+04       | 2.22E+04       | 4                 | 4              | 3              | 3              |
| 3UM  | S     | 4.6                      | 2              | 20.7           | 10.1           | 0                     | 0              | 0              | 0              | 0                  | 0              | 0              | 0              | 0                                           | 0              | 0              | 0              | 2.22E+04       | 2.22E+04       | 2.22E+04       | 2.22E+04       | 6                 | 6              | 5              | 4              |
| 4UM  | S     | 7.4                      | 6.3            | 0              | NA             | 0                     | 0              | 0              | NA             | 0                  | 0              | 0              | NA             | 0                                           | 0              | 0              | NA             | 2.22E+04       | 4.84E+04       | 2.22E+04       | NA             | 5                 | 5              | 0              | NA             |
| 5UM  | S     | 1.2                      | 3              | 8.1            | 7.2            | 0                     | 0              | 0              | 0              | 0                  | 0              | 0              | 0              | 0                                           | 0              | 0              | 0              | 2.08E+05       | 3.94E+05       | 2.74E+05       | 1.06E+06       | 7                 | 7              | 4              | 4              |
| 6SO  | S     | NA                       | 0              | 1.6            | NA             | NA                    | 0              | 16             | NA             | NA                 | 0              | 4              | NA             | NA                                          | 0              | 0              | NA             | NA             | 2.22E+04       | 2.22E+04       | NA             | NA                | 2              | 4              | NA             |
| 7SO  | S     | NA                       | 0              | 6.1            | NA             | NA                    | 10             | 0              | NA             | NA                 | 0              | 0              | NA             | NA                                          | 0              | 0              | NA             | NA             | 2.22E+04       | 2.46E+05       | NA             | NA                | 5              | 3              | NA             |
| 8SO  | S     | NA                       | 1.4            | 12             | NA             | NA                    | 0              | 0              | NA             | NA                 | 0              | 0              | NA             | NA                                          | 0              | 0              | NA             | NA             | 6.13E+05       | 6.89E+06       | NA             | NA                | 3              | 5              | NA             |
| 9SO  | S     | NA                       | 0              | 1.4            | NA             | NA                    | 4.5            | 0              | NA             | NA                 | 0              | 0              | NA             | NA                                          | 0              | 0              | NA             | NA             | 7.16E+04       | 4.66E+04       | NA             | NA                | 7              | 2              | NA             |
| 10SO | S     | NA                       | 0              | 1.8            | NA             | NA                    | 27.3           | 0              | NA             | NA                 | 0              | 0              | NA             | NA                                          | 0              | 0              | NA             | NA             | 2.22E+04       | 2.22E+04       | NA             | NA                | 8              | 0              | NA             |

NA means data not available because of colony death (those shaded in grey) or not sampled in a given time.
